# Correction: Role of conformational change and K-path ligands in controlling cytochrome *c* oxidase activity

Jian Liu, Carrie Hiser and Shelagh Ferguson-Miller

*Biochem. Soc. Trans.* (2017), volume 45, issue 5, pp. 1087–1095; <https://doi.org/10.1042/BST20160138>

The legend to [Figure 1](#) ascribes the wrong colours to the entrance residues (D132, E101) and to deoxycholate shown in the Figure. The correct legend is presented here (corrected colours underlined).

**Figure 1.** Ribbon representation of RsCcO (PDB 3DTU) showing proton uptake pathways, D and K, entrance residues (D132, E101, green), and position of the ligand-binding site occupied in this crystal structure by deoxycholate (DXC, black). Yellow indicates regions observed to undergo some conformational change when the protein is reduced (see Figures 2 and 3).

Correction published:  
15 December 2017
